# Supplementary material
Source: Royal Society of Chemistry journal article supplement (doi:10.1039/d6ob00389c)
Supplement: d6ob00389c1.pdf [file d6ob00389c1.pdf]

## Supporting Information

### **Diverse Structural Roles of Ferrocene in Mediating Ferroptosis**

#### **Induction by ML162**

Jing Wang<sup>[a]#</sup>, Wei Li<sup>[b]#</sup>, Zeqi Zhu<sup>[a]#</sup>, Ruicheng Lv<sup>[a]</sup>, Xuejing Fan<sup>[a]</sup>, Xiaomin  
Zhang<sup>[a]</sup>, Yong Wang<sup>[a]\*</sup>

[a] School of Medicine and Pharmacy, Key Laboratory of Marine Drugs, Chinese Ministry of Education, Ocean University of China, Qingdao 266003, Shandong, P. R. China; Laboratory for Marine Drugs and Bioproducts, Qingdao Marine Science and Technology Center, Qingdao, 266237, P. R. China.

E-mail: [wangyong8866@ouc.edu.cn](mailto:wangyong8866@ouc.edu.cn)

# These authors contributed equally.

The <sup>1</sup>H and <sup>13</sup>C NMR spectrum of target compounds.

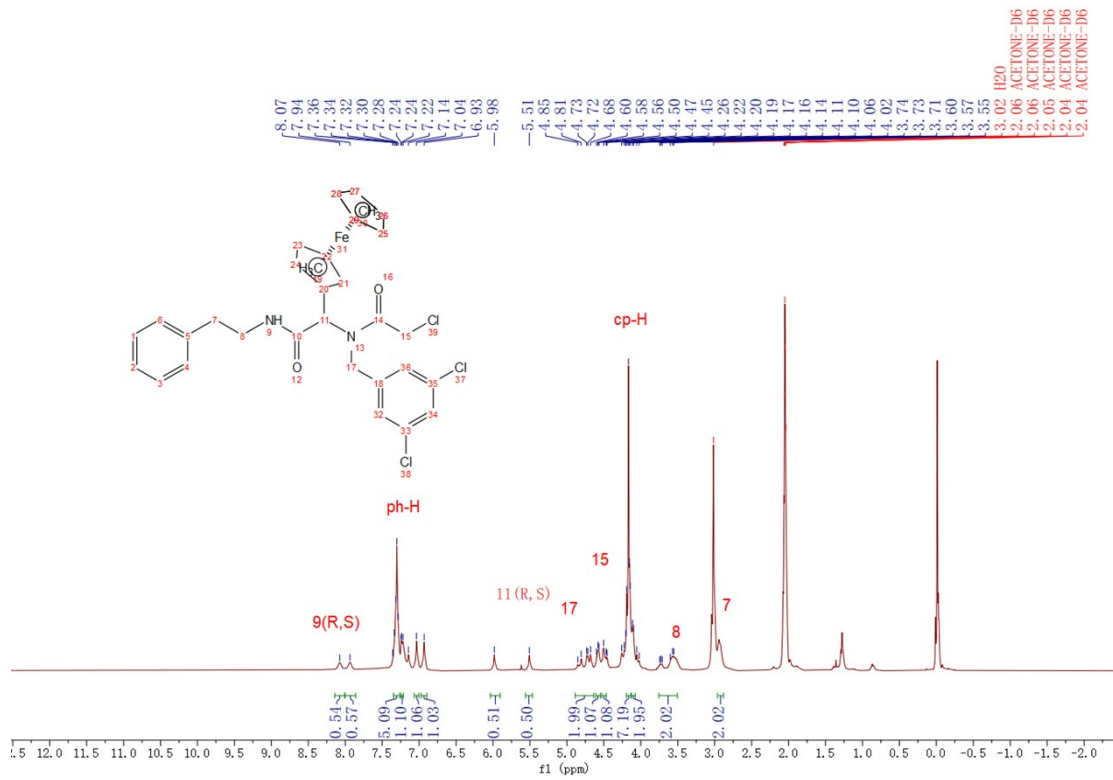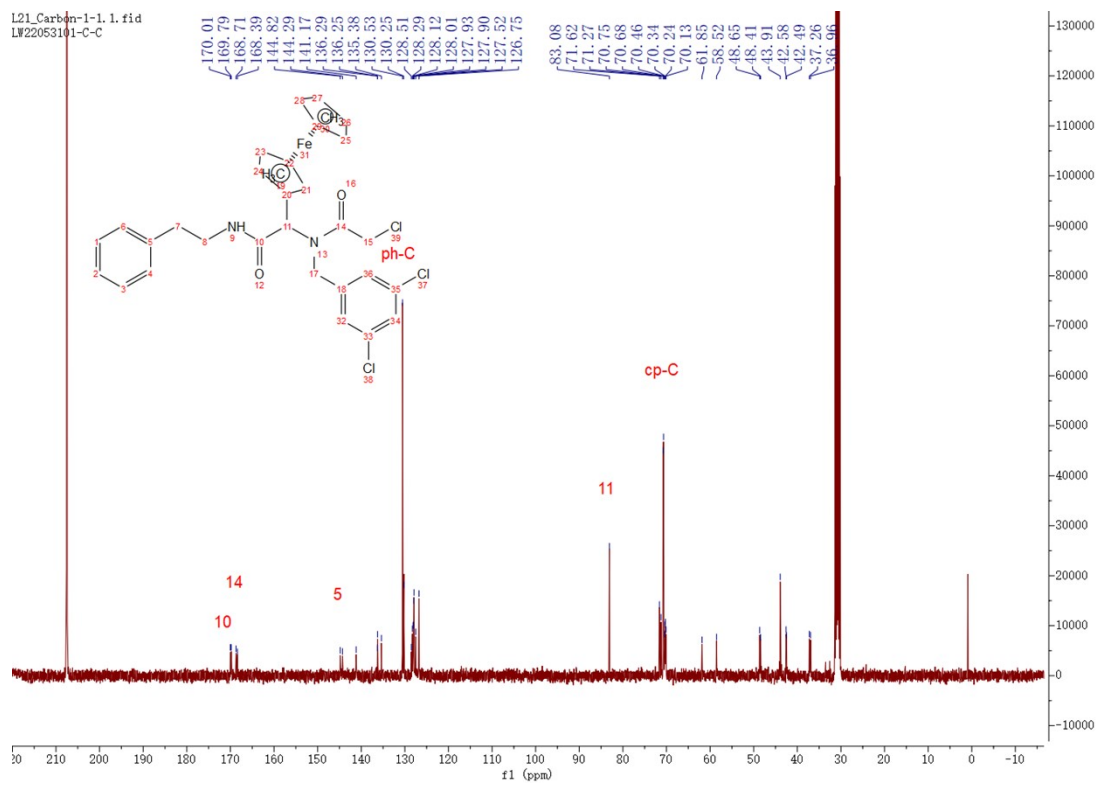

<sup>1</sup>H and <sup>13</sup>C NMR spectrum of compound I-1

LW22053102-B  
single\_pulse

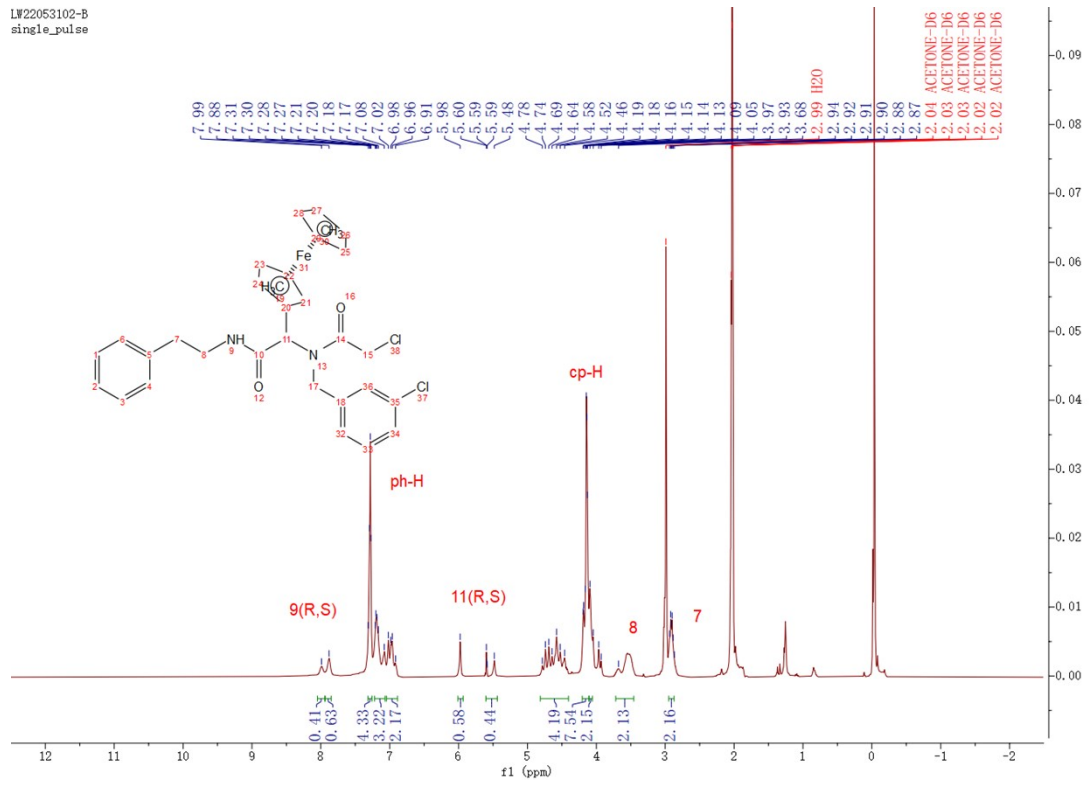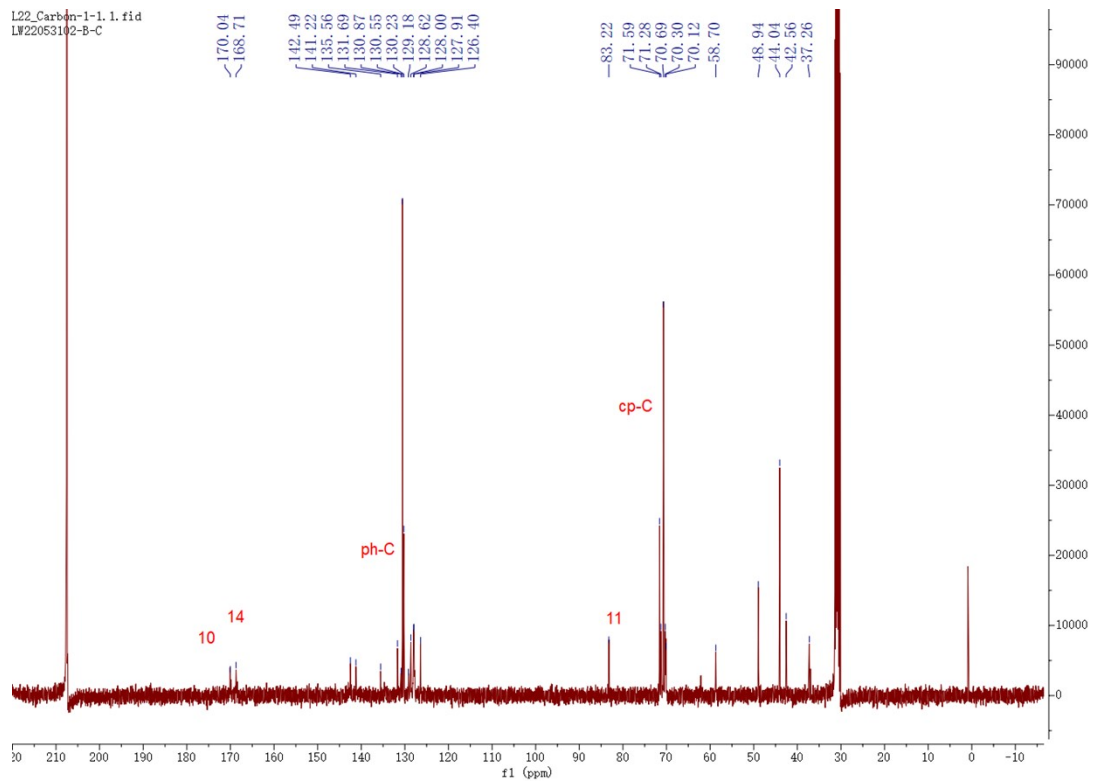

<sup>1</sup>H and <sup>13</sup>C NMR spectrum of compound I-2



LW22053103  
single\_pulse

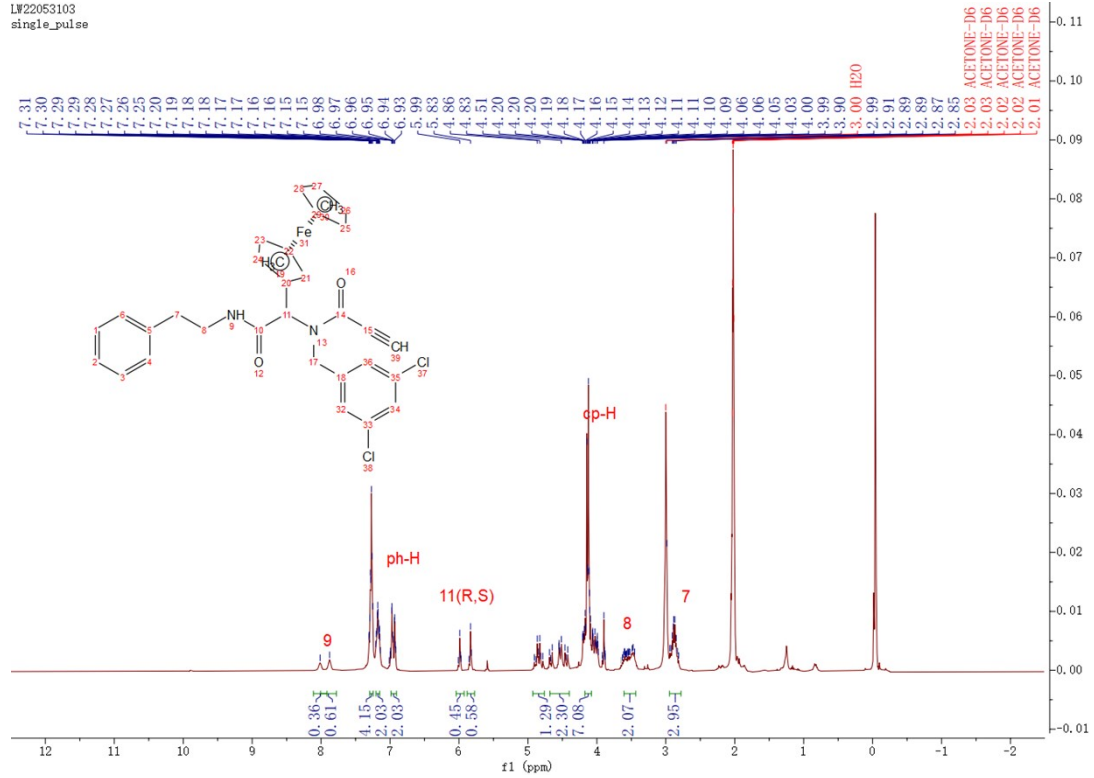

L25\_Carbon-1-1.1.fid  
LW22053103-C

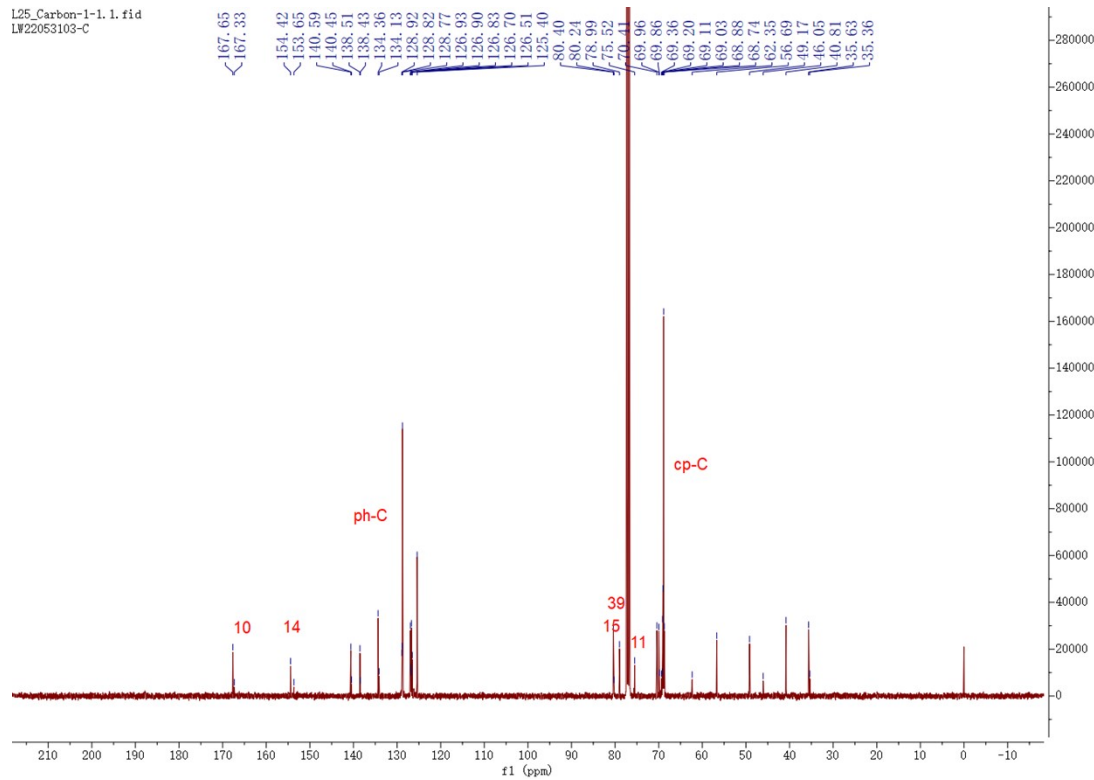

<sup>1</sup>H and <sup>13</sup>C NMR spectrum of compound I-4

LW-220411  
single\_pulse

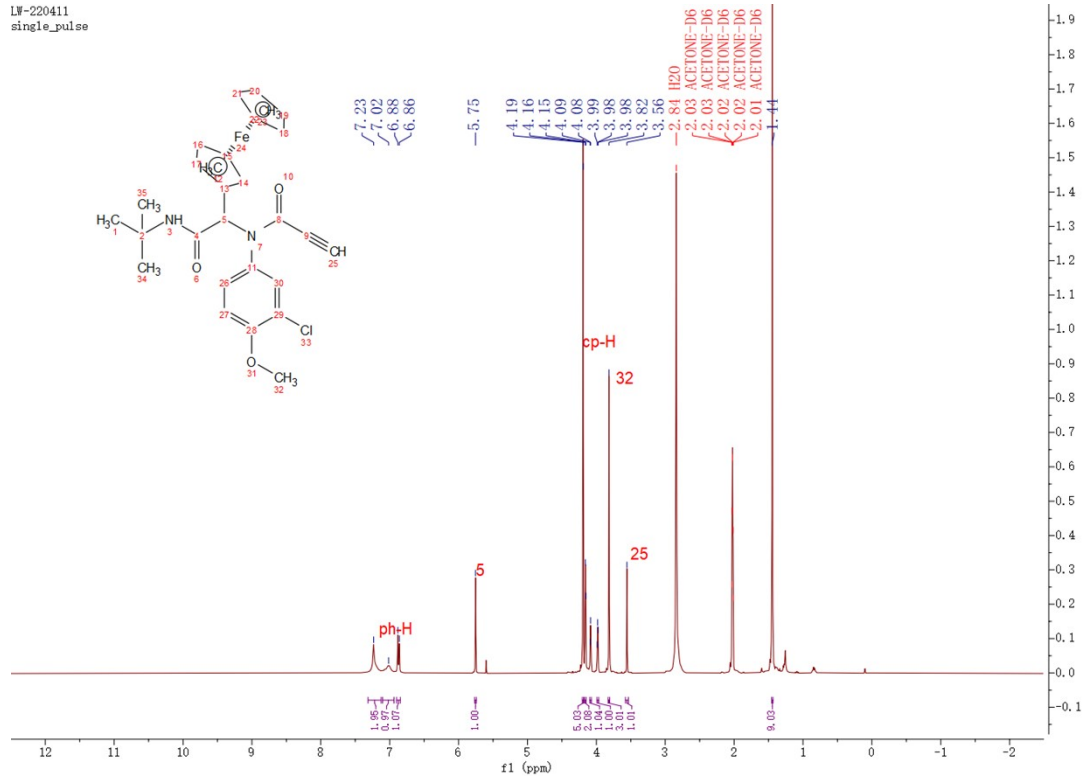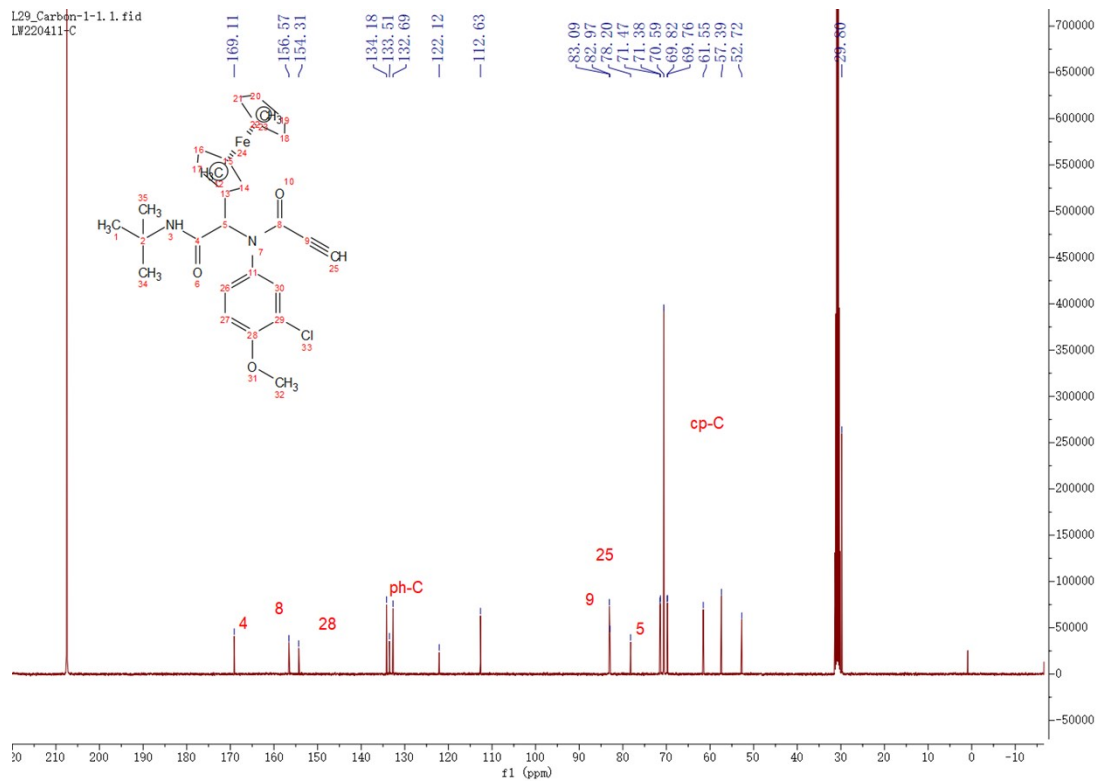

$^1\text{H}$  and  $^{13}\text{C}$  NMR spectrum of compound I-5



LW22060102  
single\_pulse

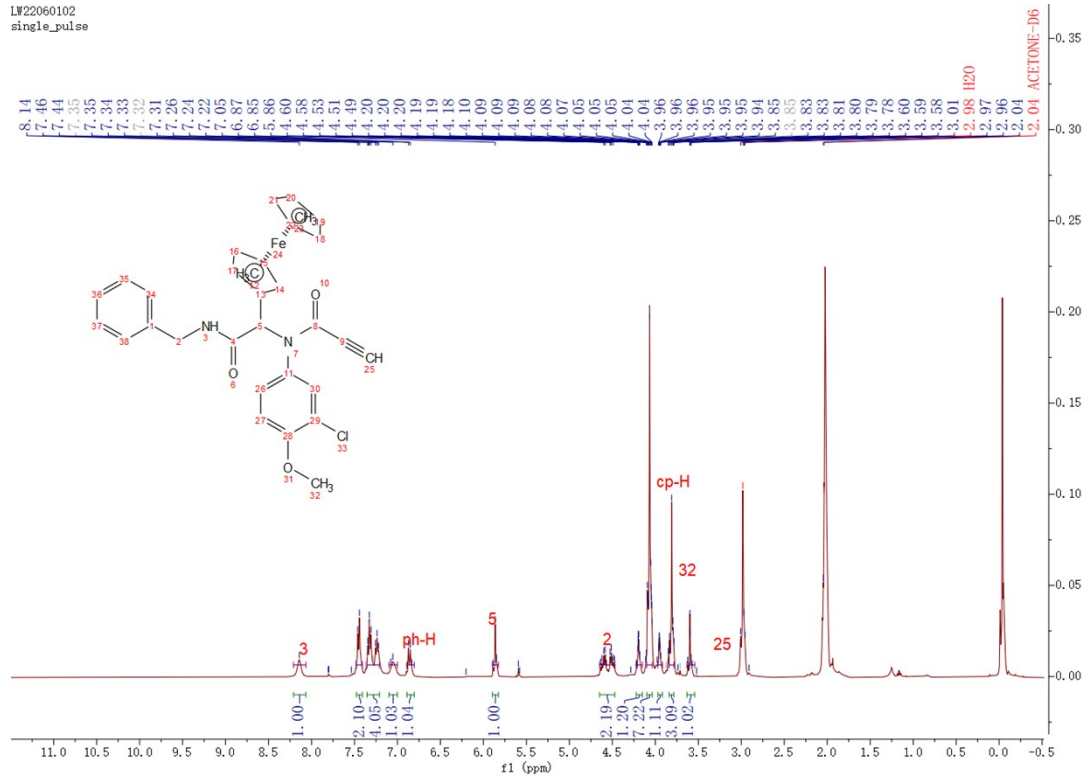

L32\_Carbon-1-1.1.fid  
LW22060102-C

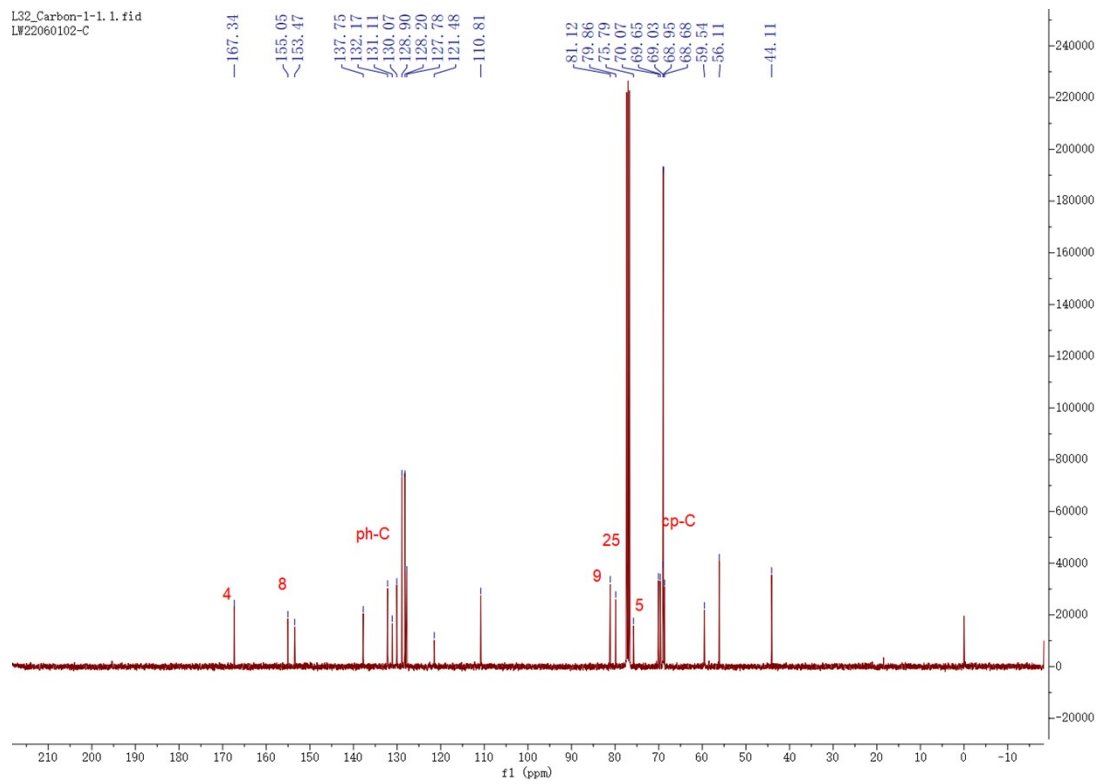

$^1\text{H}$  and  $^{13}\text{C}$  NMR spectrum of compound I-7

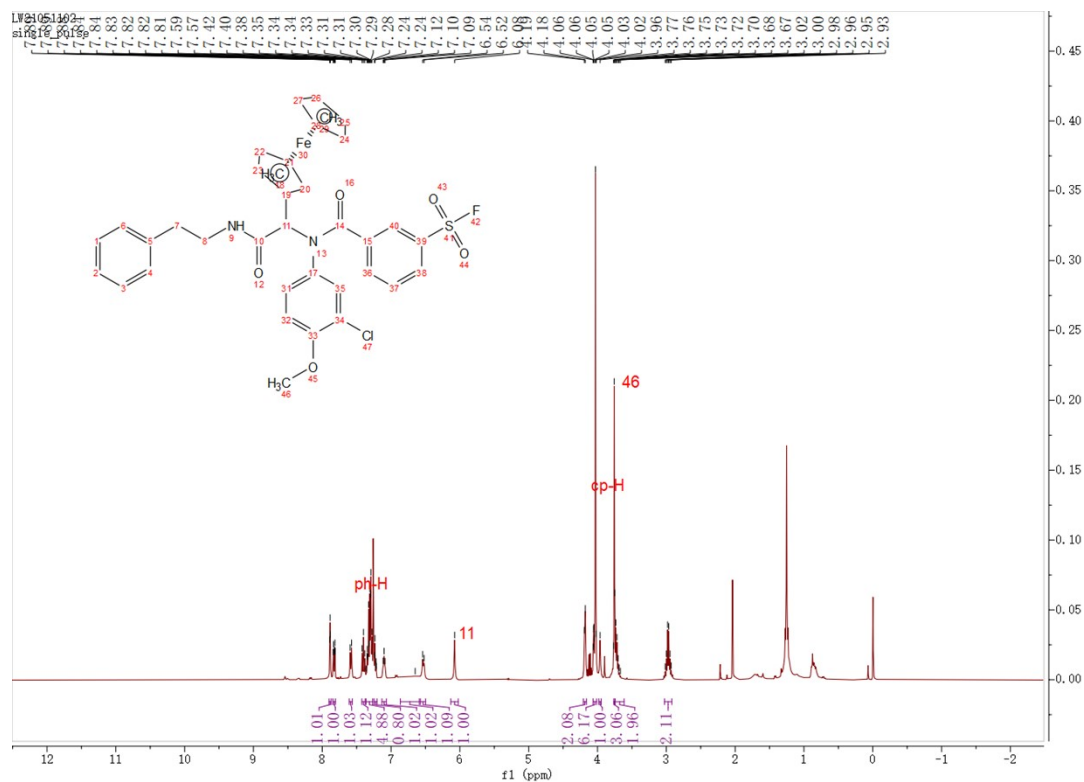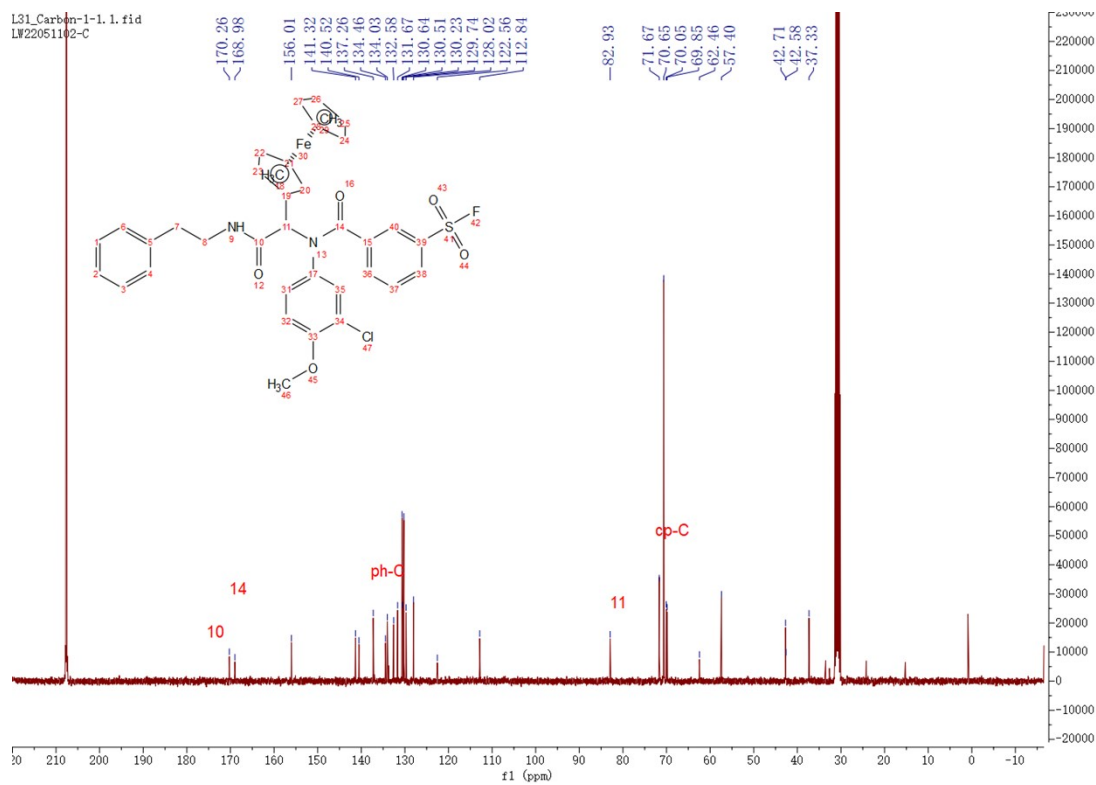

$^1\text{H}$  and  $^{13}\text{C}$  NMR spectrum of compound I-8

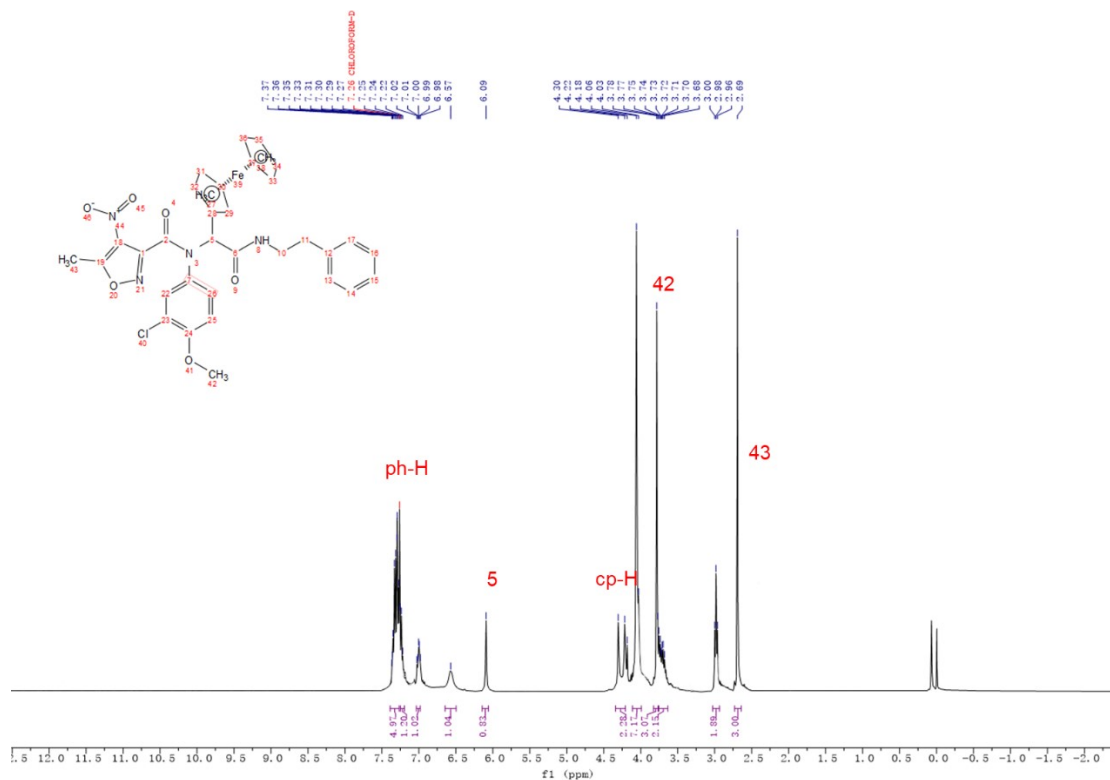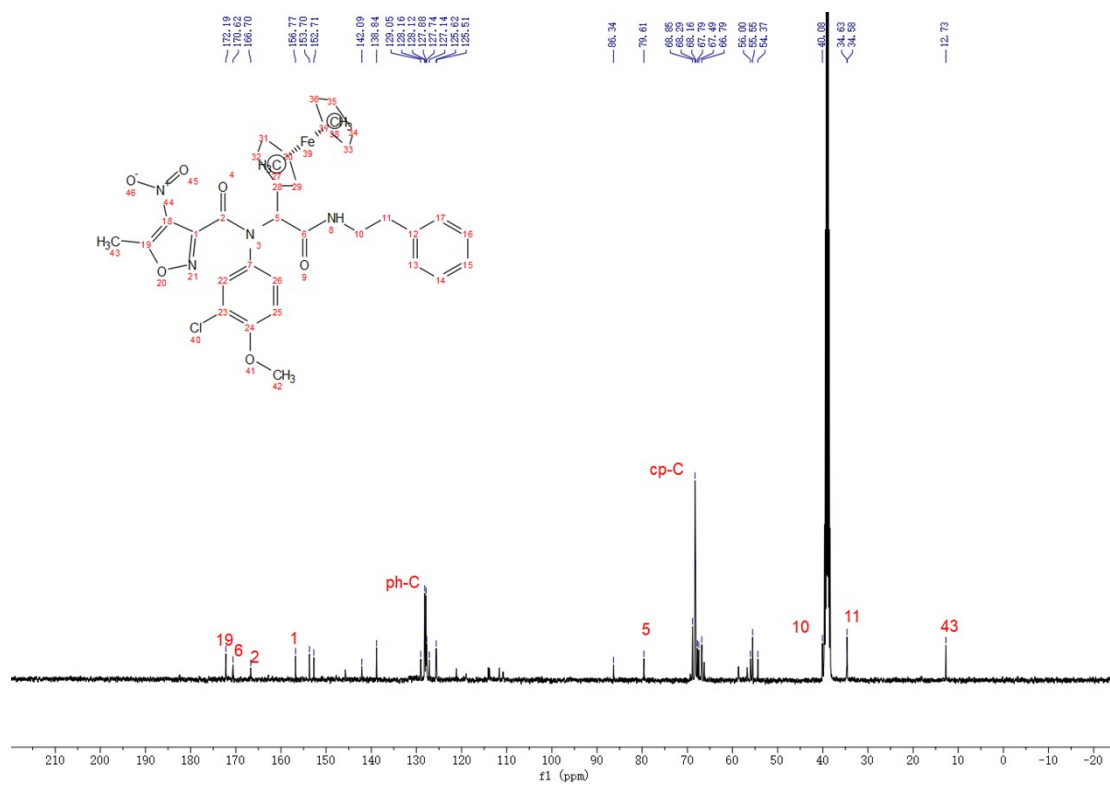

**<sup>1</sup>H NMR and <sup>13</sup>C NMR spectrum of compound I-9**

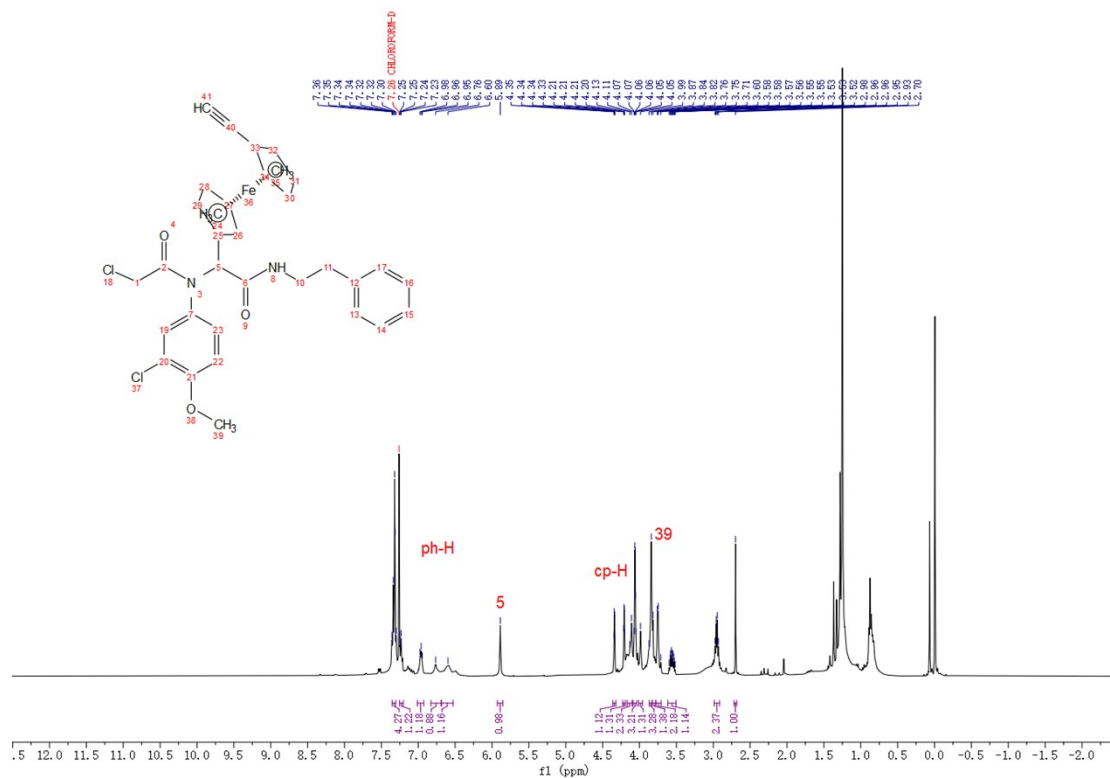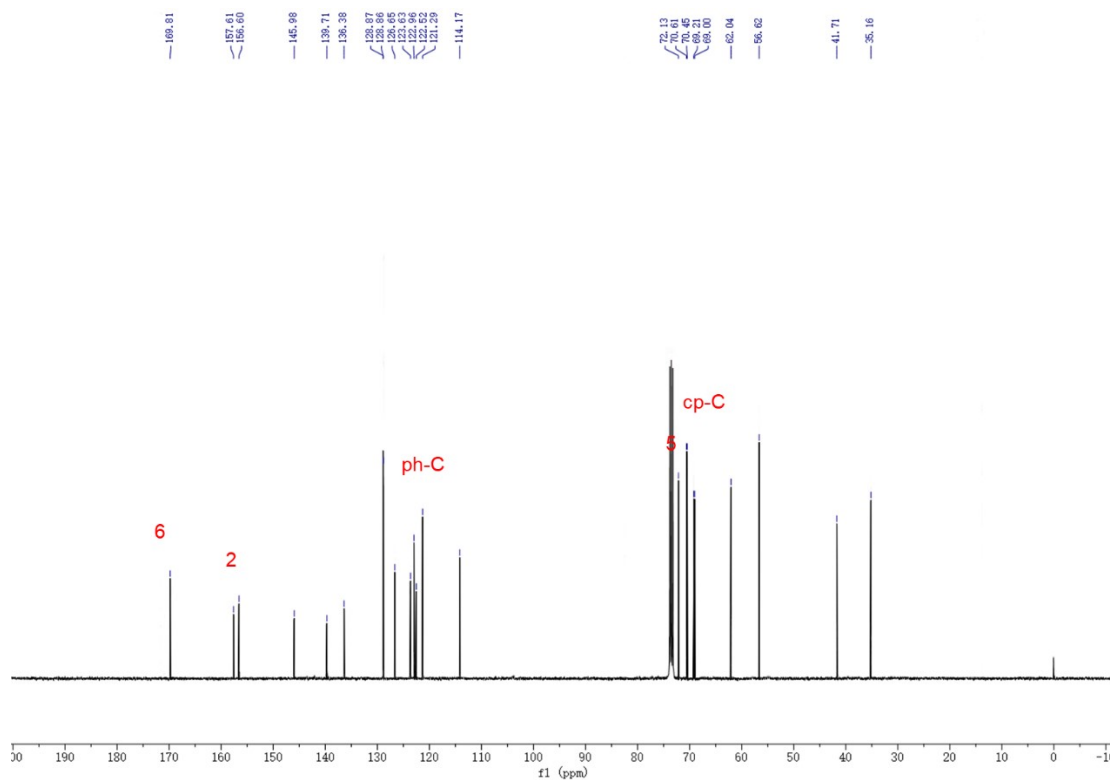

**<sup>1</sup>H NMR and <sup>13</sup>C NMR spectrum of compound I-10**



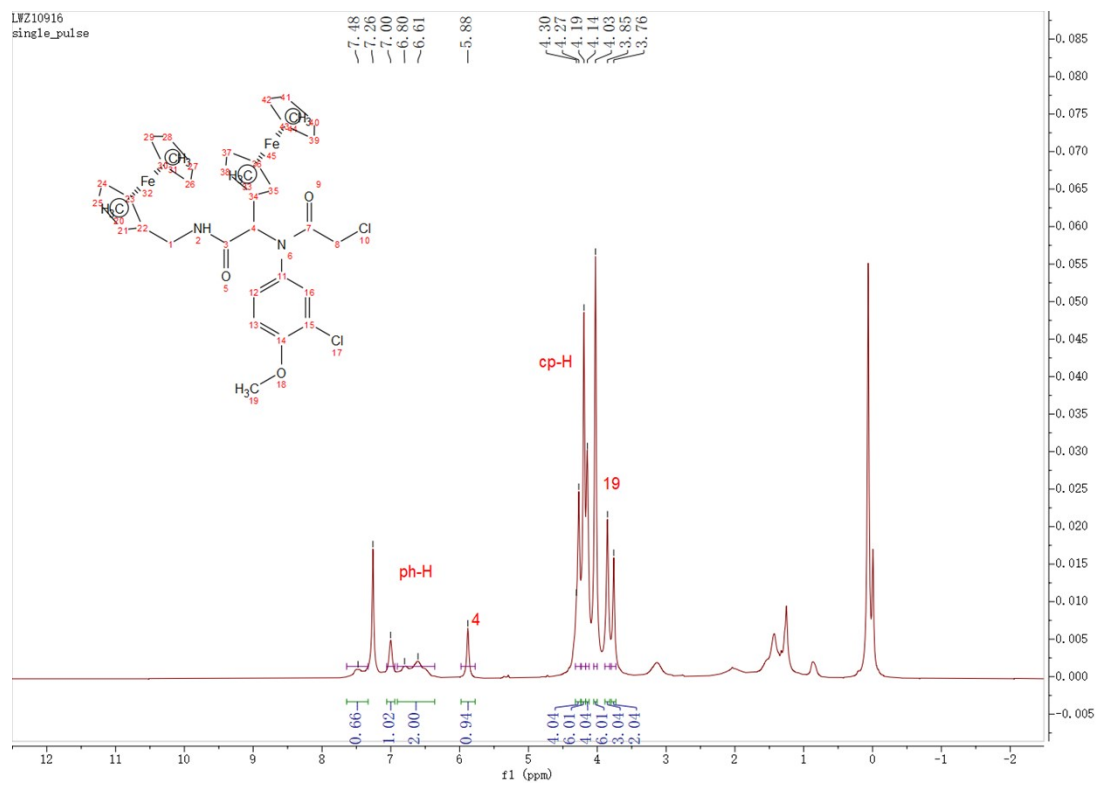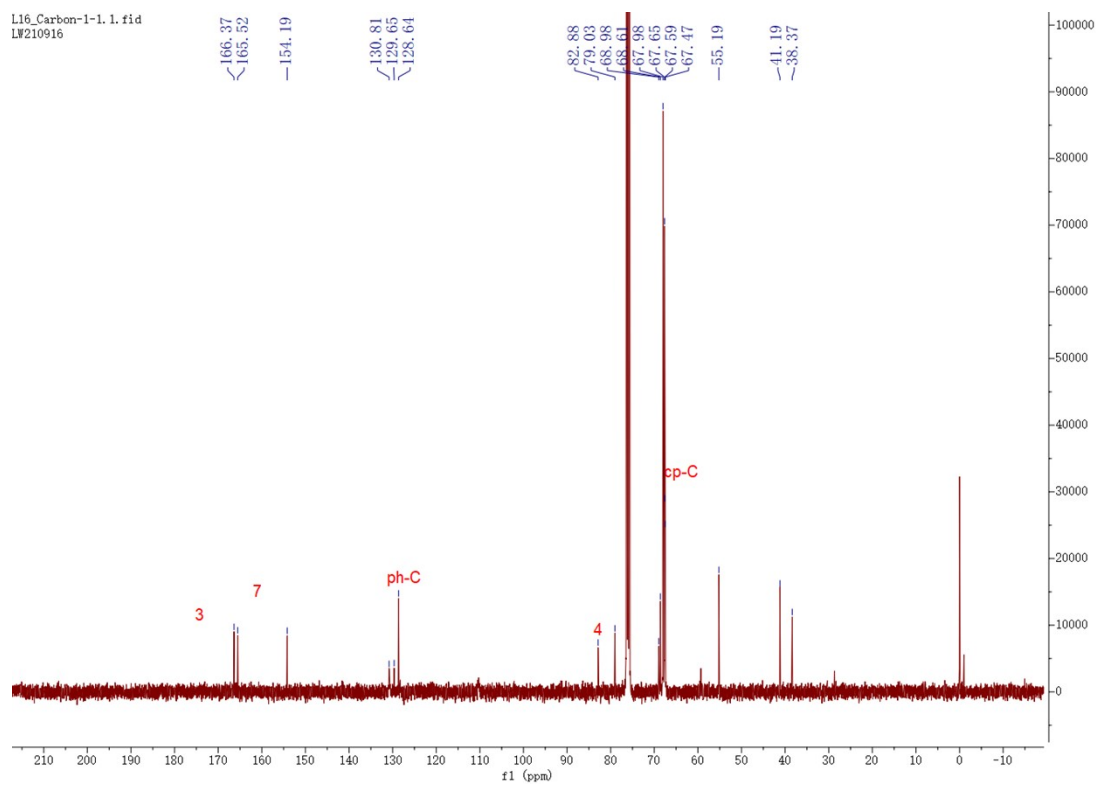

$^1\text{H}$  and  $^{13}\text{C}$  NMR spectrum of compound II-1

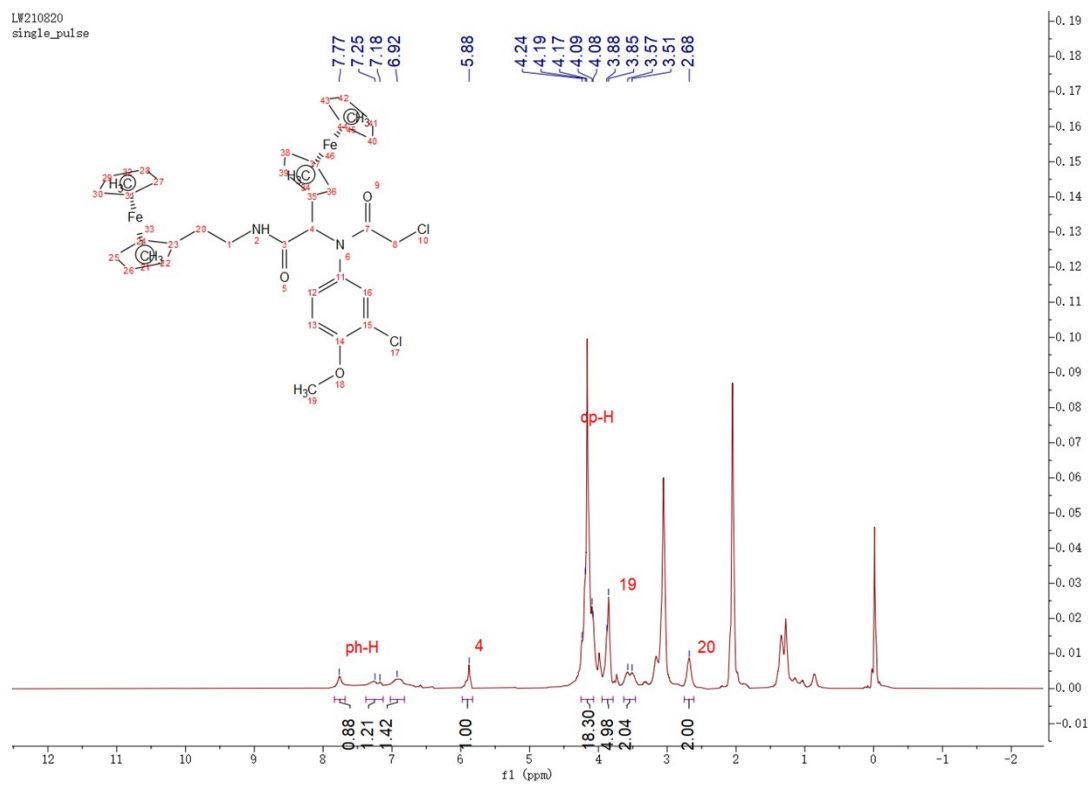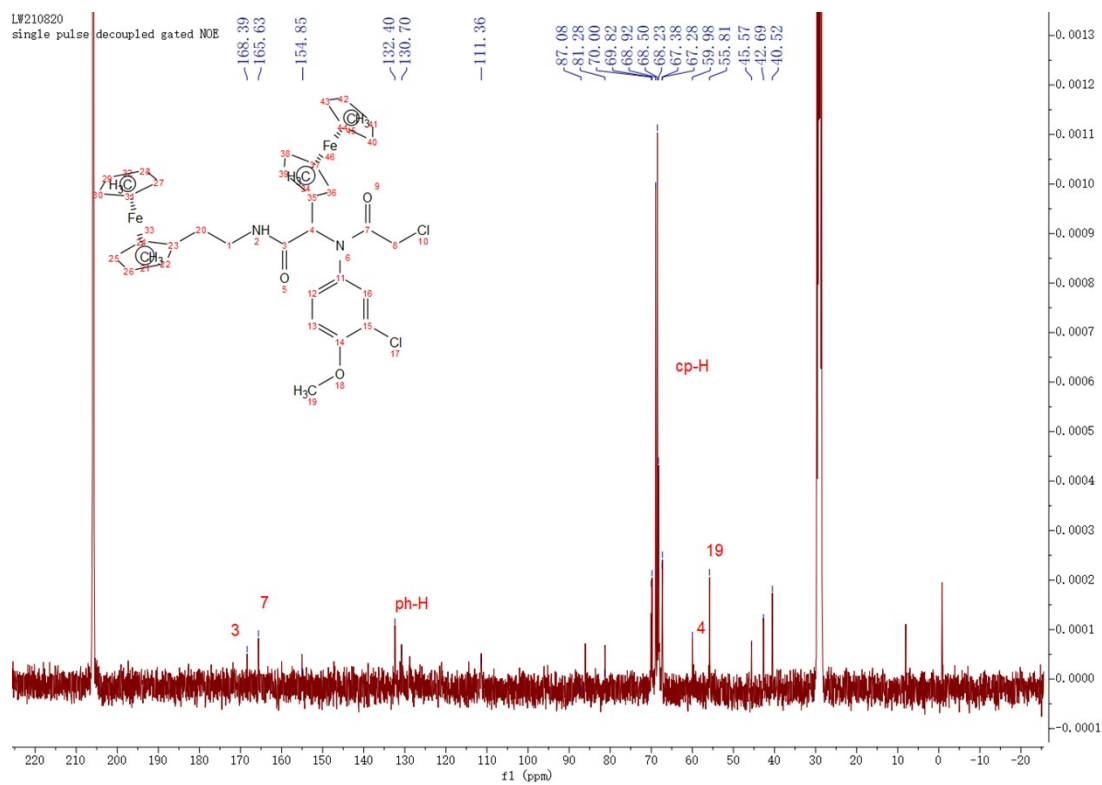

<sup>1</sup>H and <sup>13</sup>C NMR spectrum of compound II-2



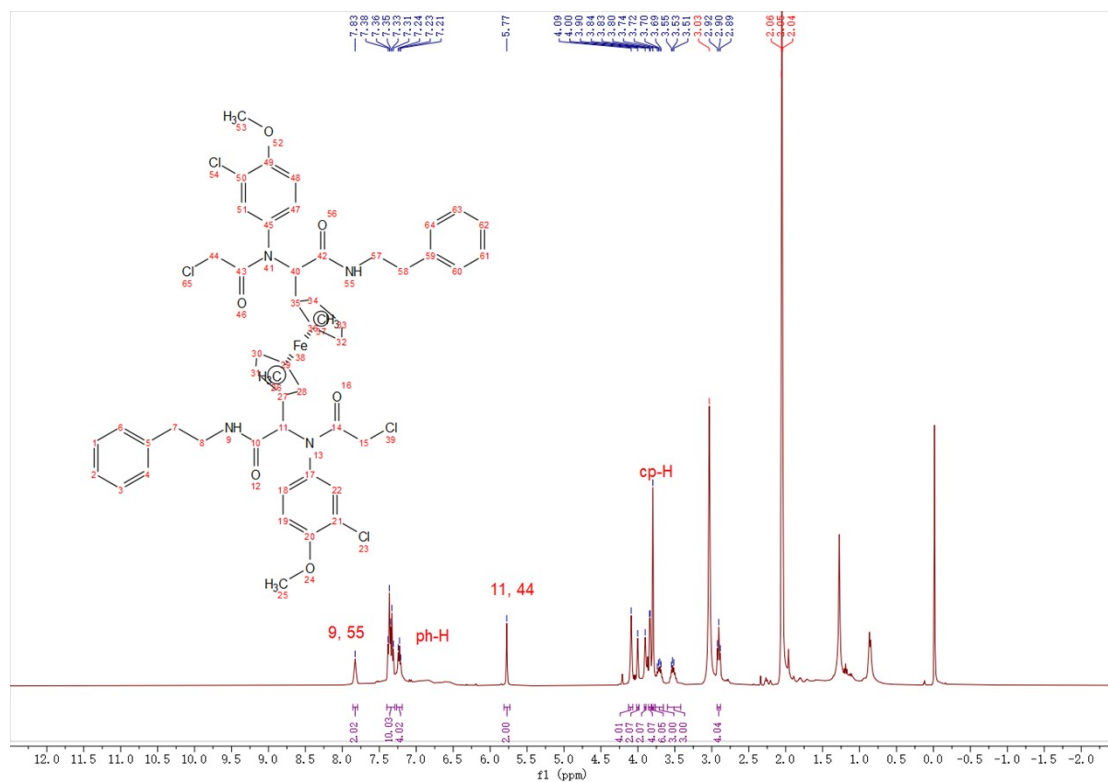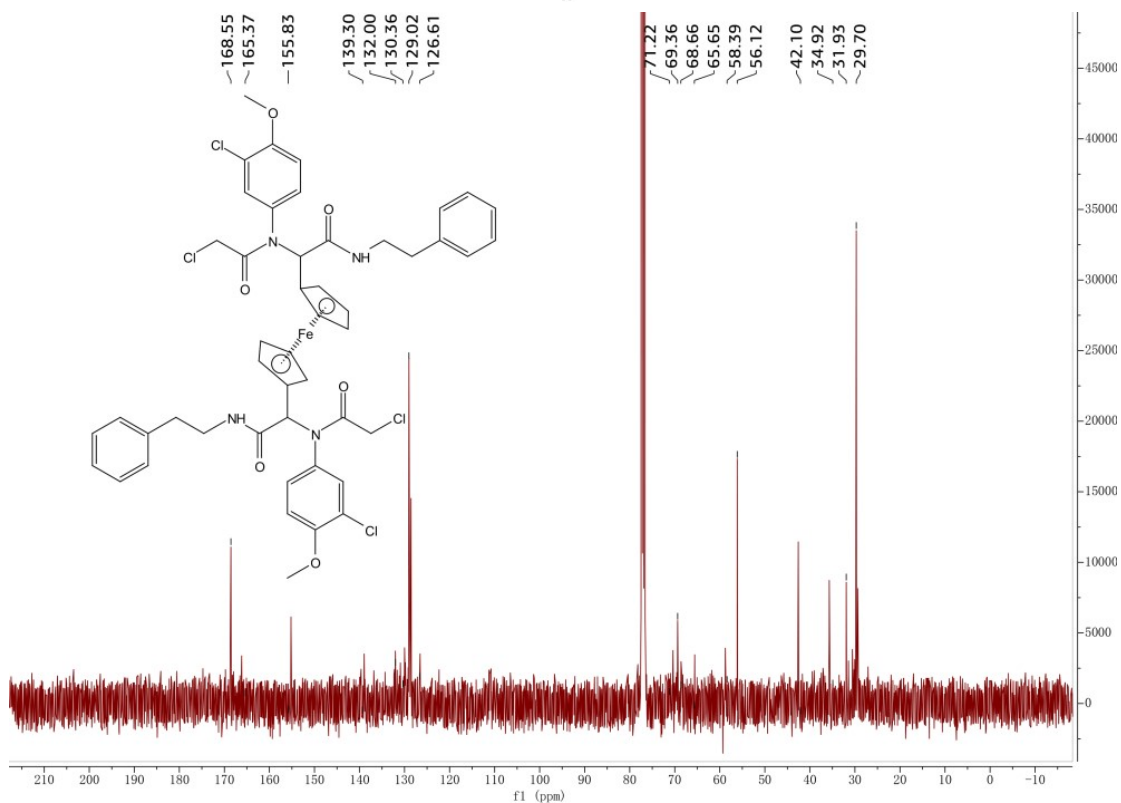

**<sup>1</sup>H and <sup>13</sup>C NMR spectrum of compound III-1**
